# Supplementary material for: Xenograft of Human Umbilical Mesenchymal Stem Cells Promotes Recovery from Chronic Ischemic Stroke in Rats
Source: MDPI journal article supplement (doi:10.3390/ijms23063149), 2022-03-15
Supplement: s1 [file s1]

# Supplement Table S1. Rotarod test

| Days after stroke | Normal+Saline (n=11) | Normal+HUMSCs (n=11) | Stroke+Saline (n=15) | Stroke+HUMSCs (n=14) |
|-------------------|----------------------|----------------------|----------------------|----------------------|
| -1                | 100.00±0.00          | 100.00±0.00          | 100.00±0.00          | 100.00±0.00          |
| 1                 | 100.47±6.39          | 102.17±6.21          | 20.39±2.76 *#        | 22.75±2.08 *#        |
| 4                 | 102.19±5.74          | 100.95±4.51          | 25.92±2.35 *#        | 30.28±3.32 *#        |
| 7                 | 103.05±5.12          | 107.00±5.36          | 29.82±2.84 *#        | 34.48±2.23 *#        |
| 14                | 104.09±5.96          | 106.64±7.56          | 29.82±2.57 *#        | 37.28±3.20 *#        |
| 21                | 91.47±7.01           | 90.97±7.28           | 27.01±2.70 *#        | 48.57±3.38 *#♣       |
| 28                | 93.33±6.09           | 91.00±4.41           | 27.18±2.89 *#        | 59.81±4.81 *#♣       |
| 35                | 91.47±6.65           | 96.62±6.61           | 28.17±2.30 *#        | 61.32±3.42 *#♣       |
| 42                | 93.56±5.36           | 100.93±8.17          | 27.93±2.65 *#        | 70.51±3.82 #♣        |
| 49                | 92.06±6.16           | 96.05±8.79           | 27.71±3.32 *#        | 72.48±3.22 ♣         |
| 56                | 94.30±5.39           | 95.67±5.59           | 25.35±1.94 *#        | 75.58±3.42 ♣         |

\* vs. the Normal+Saline group at the same day,  $p < 0.05$

# vs. the Normal+HUMSCs group at the same day,  $p < 0.05$

♣ vs. the Stroke+Saline group at the same day,  $p < 0.05$

**Supplement Table S2. Contralateral use (%)**

| Days after stroke | Normal+Saline (n=11) | Normal+HUMSCs (n=11) | Stroke+Saline (n=15) | Stroke+HUMSCs (n=14) |
|-------------------|----------------------|----------------------|----------------------|----------------------|
| -1                | 50.00±1.24           | 49.56±1.42           | 49.33±1.03           | 50.57±1.21           |
| 1                 | 50.18±1.41           | 49.27±1.30           | 13.60±1.37 *#        | 12.14±1.32 *#        |
| 4                 | 48.91±0.87           | 49.27±1.33           | 21.20±1.42 *#        | 15.43±1.46 *#        |
| 7                 | 48.00±1.18           | 48.00±1.18           | 19.20±1.57 *#        | 16.29±1.29 *#        |
| 14                | 48.91±1.02           | 49.09±1.12           | 15.73±1.65 *#        | 18.00±1.68 *#        |
| 21                | 46.45±0.68           | 43.79±1.18           | 17.30±1.81 *#        | 28.29±1.84 *#♣       |
| 28                | 49.68±1.47           | 47.82±0.47           | 13.60±1.85 *#        | 30.00±2.26 *#♣       |
| 35                | 50.56±1.10           | 52.27±0.70           | 14.40±1.96 *#        | 30.83±1.90 *#♣       |
| 42                | 49.16±1.18           | 53.04±0.59           | 15.20±1.95 *#        | 30.00±2.76 *#♣       |
| 49                | 50.44±0.94           | 52.79±1.64           | 13.27±1.93 *#        | 31.78±3.06 *#♣       |
| 56                | 51.40±1.54           | 52.16±1.27           | 14.27±1.58 *#        | 32.73±2.31 *#♣       |

\* vs. the Normal+Saline group at the same day,  $p < 0.05$

# vs. the Normal+HUMSCs group at the same day,  $p < 0.05$

♣ vs. the Stroke+Saline group at the same day,  $p < 0.05$

**Supplement Table S3. Edema volume in cortex using MRI**

| Days after stroke | Normal+Saline (n=4) | Normal+HUMSCs (n=4) | Stroke+Saline (n=4) | Stroke+HUMSCs (n=4) |
|-------------------|---------------------|---------------------|---------------------|---------------------|
| 1                 | 0.00±0.00           | 0.00±0.00           | 132.40±16.73 *#     | 130.82±7.54 *#      |
| 7                 | 0.00±0.00           | 0.00±0.00           | 49.12±10.50 *#      | 63.30±6.29 *#       |
| 14                | 0.00±0.00           | 0.00±0.00           | 41.83±3.33 *#       | 46.42±5.98 *#       |
| 21                | 0.00±0.00           | 0.00±0.00           | 11.96±3.82          | 39.55±7.31 *#♣      |
| 28                | 0.00±0.00           | 0.00±0.00           | 9.35±1.61           | 37.89±6.01 *#♣      |
| 35                | 0.00±0.00           | 0.00±0.00           | 9.45±3.87           | 35.52±6.64 *#♣      |
| 42                | 0.00±0.00           | 0.00±0.00           | 9.35±3.70           | 33.97±5.63 *#♣      |
| 49                | 0.00±0.00           | 0.00±0.00           | 9.72±3.62           | 33.51±5.34 *#♣      |
| 56                | 0.00±0.00           | 0.00±0.00           | 11.14±3.05          | 32.14±4.17 *#♣      |

\* vs. the Normal+Saline group at the same day,  $p < 0.05$

# vs. the Normal+HUMSCs group at the same day,  $p < 0.05$

♣ vs. the Stroke+Saline group at the same day,  $p < 0.05$

**Supplement Table S4. Atrophy volume in cortex using MRI**

| Days after stroke | Normal+Saline (n=4) | Normal+HUMSCs (n=4) | Stroke+Saline (n=4) | Stroke+HUMSCs (n=4) |
|-------------------|---------------------|---------------------|---------------------|---------------------|
| 1                 | 0.00±0.00           | 0.00±0.00           | 0.00±0.00           | 0.00±0.00           |
| 7                 | 0.92±1.46           | 1.66±0.68           | 36.24±1.52 *#       | 44.03±2.21 *#       |
| 14                | 1.18±1.66           | -0.93±1.43          | 65.65±2.68 *#       | 71.90±1.67 *#       |
| 21                | -2.49±4.20          | 2.84±3.09           | 150.33±6.76 *#      | 78.40±2.67 *#♣      |
| 28                | 6.42±1.52           | -1.12±1.40          | 148.24±7.75 *#      | 79.62±2.53 *#♣      |
| 35                | 3.42±2.28           | 4.78±2.27           | 154.89±6.72 *#      | 80.58±3.07 *#♣      |
| 42                | 3.41±3.24           | 1.50±3.93           | 159.99±6.71 *#      | 81.72±3.06 *#♣      |
| 49                | 3.34±0.87           | 7.73±1.83           | 162.26±5.57 *#      | 80.86±2.92 *#♣      |
| 56                | 0.65±1.03           | 4.96±5.55           | 162.70±5.22 *#      | 81.22±2.81 *#♣      |

\* vs. the Normal+Saline group at the same day,  $p < 0.05$

# vs. the Normal+HUMSCs group at the same day,  $p < 0.05$

♣ vs. the Stroke+Saline group at the same day,  $p < 0.05$

Supplement Table S5. Atrophy volume by cresyl violet staining brain section

| <div>mm<sup>3</sup></div> <div>Group</div> | Normal+Saline<br>(n=4) | Normal+HUMSCs<br>(n=4) | Stroke+Saline<br>(n=12) | Stroke+HUMSCs<br>(n=14) |
|--------------------------------------------|------------------------|------------------------|-------------------------|-------------------------|
| Atrophy volume                             | 0.73±0.34              | 0.24±0.98              | 133.88±3.90 * #         | 89.69±3.72 * # ♣        |

\*vs. the Normal+Saline group, *p* < 0.05  
#vs. the Normal+HUMSCs group, *p* < 0.05  
♣vs. the Stroke+Saline group, *p* < 0.05

**Supplement Table S6. NeuN<sup>+</sup> number by anti-NeuN staining brain section**

| Side \ Group |               | Normal+Saline<br>(n=4) | Normal+HUMSCs<br>(n=4) | Stroke+Saline<br>(n=9) | Stroke+HUMSCs<br>(n=10) |
|--------------|---------------|------------------------|------------------------|------------------------|-------------------------|
| Cortex       | Contralateral | 241.25±17.57           | 245.25±25.39           | 258.00±13.03           | 228.20±4.66             |
|              | Ipsilateral   | 246.00±22.68           | 233.50±19.21           | 150.44±12.11 * # ♠     | 232.90±5.69 ♣           |
| Striatum     | Contralateral | 204.75±17.90           | 205.50±20.47           | 206.22±13.89           | 195.30±7.20             |
|              | Ipsilateral   | 196.00±7.04            | 206.75±19.81           | 128.44±6.61 * # ♠      | 196.00±9.02 ♣           |

\* vs. ipsilateral cortex of the Normal+Saline group,  $p < 0.05$

# vs. ipsilateral cortex of the Normal+HUMSCs group,  $p < 0.05$

♣ vs. ipsilateral cortex of the Stroke+Saline group,  $p < 0.05$

♠ vs. contra-lateral vs. ipsi-lateral region in the Stroke+Saline group,  $p < 0.05$

**Supplement Table S7. Vessel length and density by Dextran-FITC**

| Staining Side \ Group |               | Normal+Saline (n=4) | Normal+HUMSCs (n=4) | Stroke+Saline (n=4) | Stroke+HUMSCs (n=4) |
|-----------------------|---------------|---------------------|---------------------|---------------------|---------------------|
| Vessel length         | Contralateral | 40.66±3.44          | 43.56±1.73          | 35.09±1.78          | 35.71±1.73          |
|                       | Ipsilateral   | 42.10±1.42          | 41.20±0.98          | 21.25±2.79 *#♠      | 32.50±2.03 ♣        |
| Vessel density        | Contralateral | 0.24±0.01           | 0.25±0.01           | 0.23±0.01           | 0.22±0.01           |
|                       | Ipsilateral   | 0.25±0.02           | 0.25±0.02           | 0.12±0.02 *#♠       | 0.24±0.02 ♣         |

\* vs. ipsilateral cortex of the Normal+Saline group,  $p < 0.05$

# vs. ipsilateral cortex of the Normal+HUMSCs group,  $p < 0.05$

♣ vs. ipsilateral cortex of the Stroke+Saline group,  $p < 0.05$

♠ vs. contra-lateral vs. ipsi-lateral region in the Stroke+Saline group,  $p < 0.05$
